# Supplementary material
Source: publisher figshare collection journal article supplement (https://acs.figshare.com/ndownloader/files/22863044)
Supplement: Supplementary file 1 [file 22863044]

# Supporting Information

## Universal Antifogging and Antimicrobial Thin Coating Based on Dopamine-Containing Glycopolymers

*Kai Feng,<sup>†</sup> Lun Peng,<sup>†,§</sup> Liyin Yu,<sup>‡</sup> Yuqing Zheng,<sup>†</sup> Rui Chen,<sup>‡</sup> Weidong Zhang,<sup>\*,†</sup>*

*Gaojian Chen<sup>\*,†,‡</sup>*

<sup>†</sup> Center for Soft Condensed Matter Physics and Interdisciplinary Research & School of

Physical Science and Technology, Soochow University, Suzhou 215006, People's

Republic of China

<sup>‡</sup> State and Local Joint Engineering Laboratory for Novel Functional Polymeric

Materials, College of Chemistry, Chemical Engineering and Materials Science,

Soochow University, Suzhou 215123, People's Republic of China

Corresponding Authors

\*E-mail: zhangweidong@suda.edu.cn.

\*E-mail: gchen@suda.edu.cn.

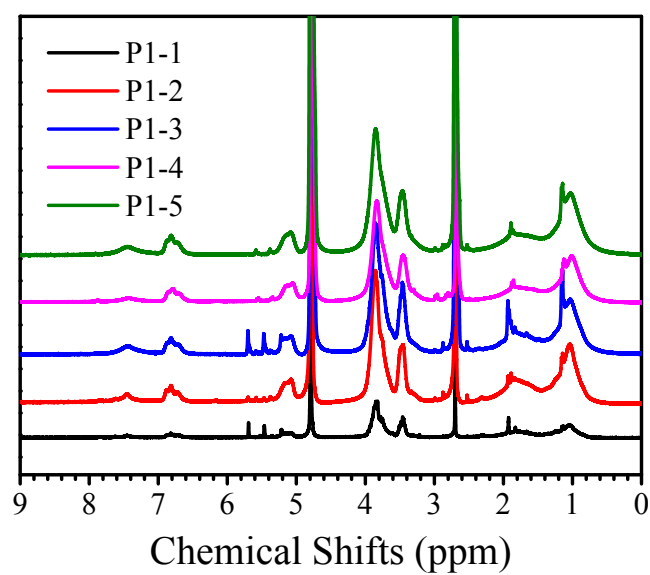

**Figure S1.** <sup>1</sup>H NMR spectra of P1s in D<sub>2</sub>O.

---

<sup>1</sup> Current address

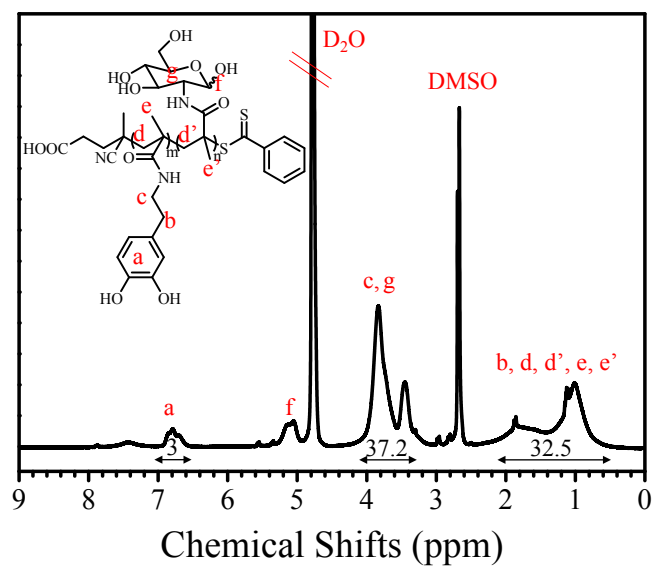

**Figure S2.**  $^1\text{H}$  NMR spectrum and characteristic peak integrals of P1-4 in  $\text{D}_2\text{O}$ .

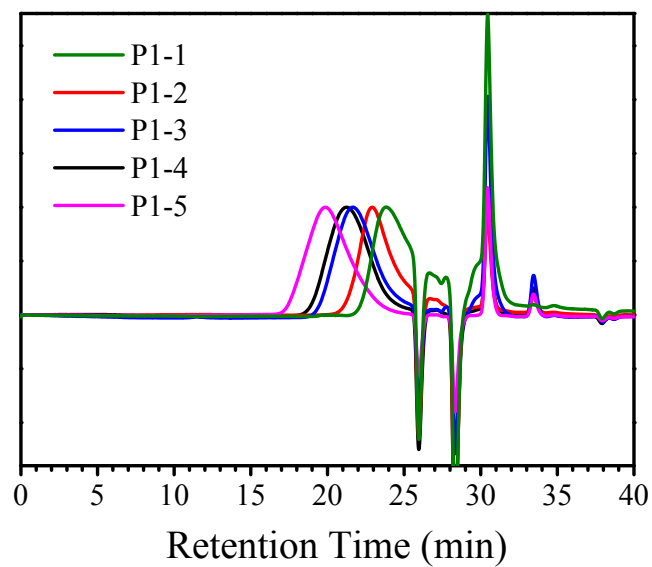

**Figure S3.** Size-exclusion chromatography (SEC) spectra of P1s.

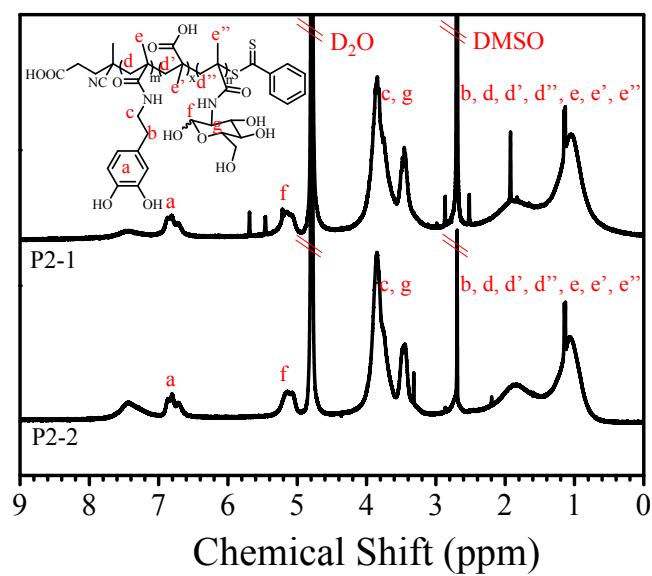

**Figure S4.**  $^1\text{H}$  NMR spectra of P2s in  $\text{D}_2\text{O}$ .

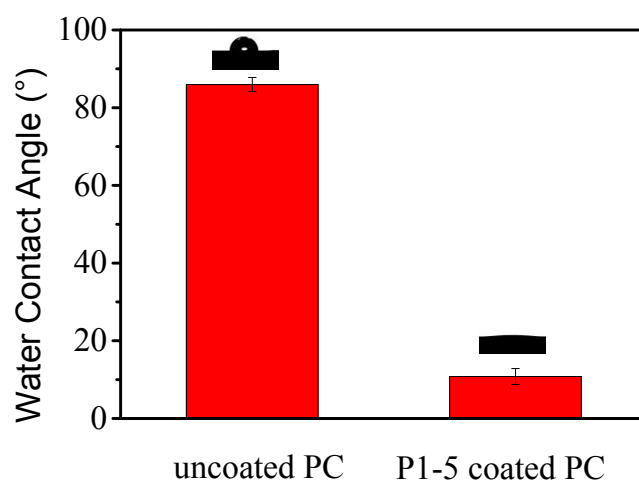

**Figure S5.** Water contact angle of uncoated PC and P1-5 coated PC.

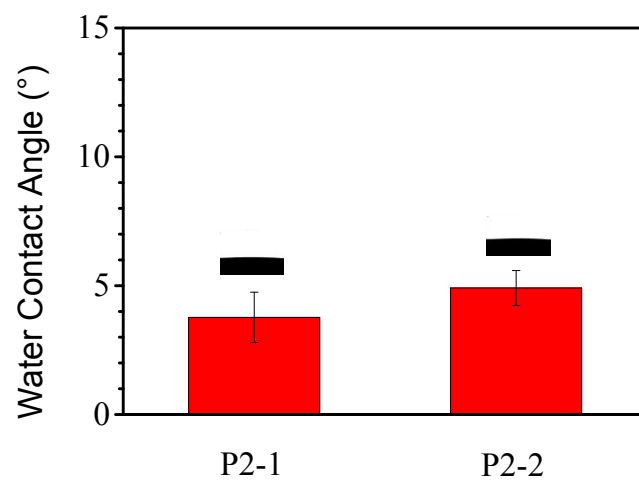

**Figure S6.** Water contact angle of P2s coated glass slides.

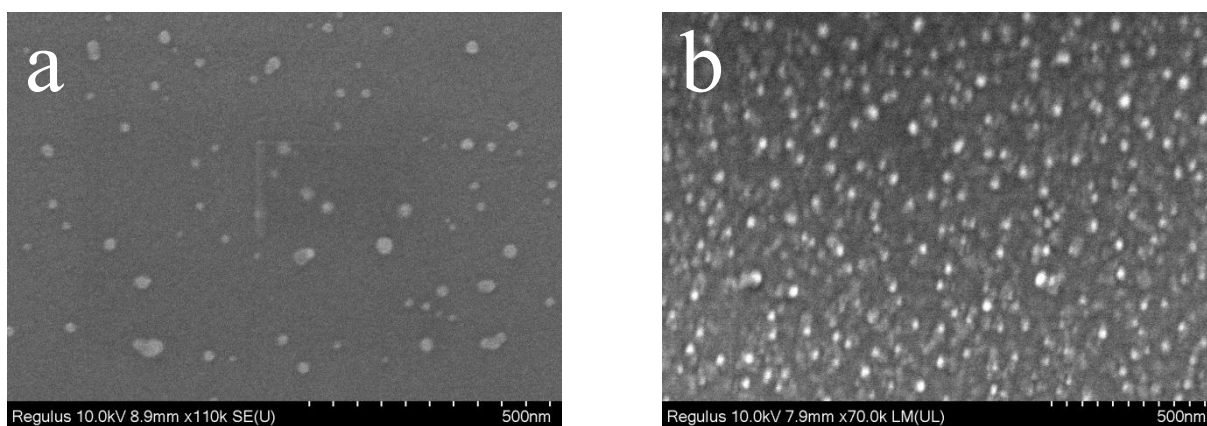

**Figure S7.** SEM images of (a) P2-1 and (b) P2-2 coated silicon wafers with in situ formed AgNPs.

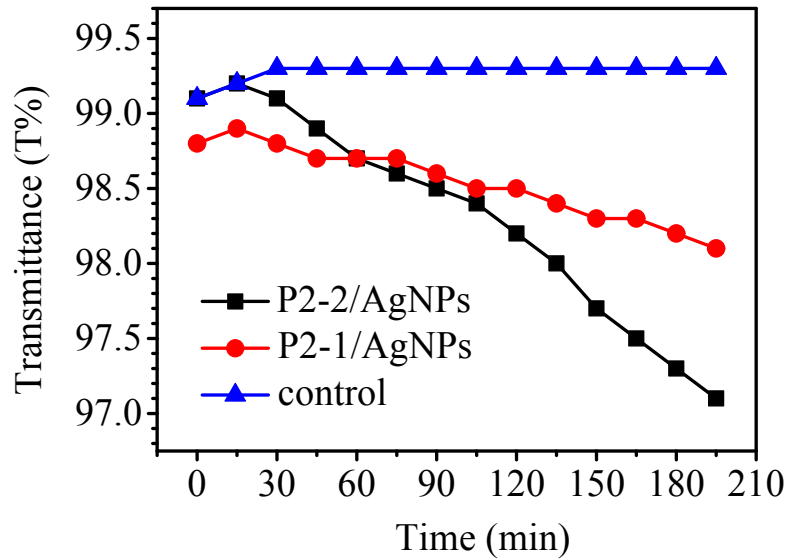

**Figure S8.** The transmittances of *E. coli* suspension (OD = 0.03 at 620 nm) in sterile PBS with/without P2s/AgNPs coated silicon wafers at 620 nm monitored by an UV-vis spectrometer within about 3 h, in which the coated silicon wafers were cut into 0.5 cm × 0.5 cm pieces. The test interval is 15 minutes.

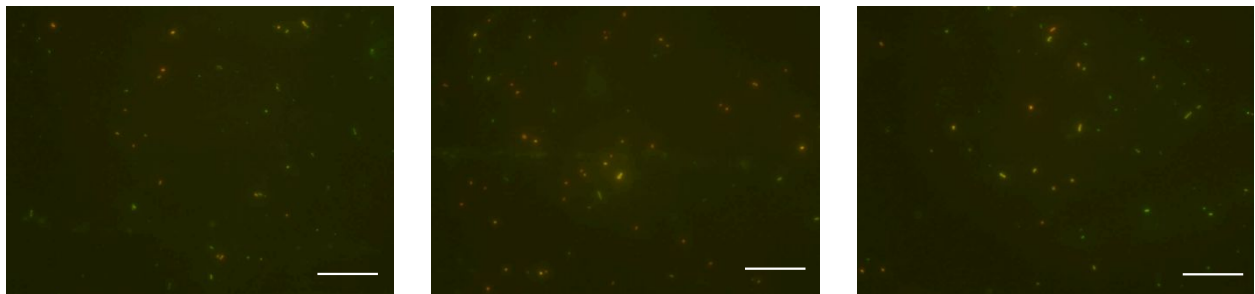

**Figure S9.** Typical fluorescent images of *E. coli* adhered on P2-2/AgNPs coated silicon wafers, which were observed by a fluorescence microscope (IX71, Olympus, Japan) with a 40× objective. The bacterial concentration was  $1 \times 10^7$  colony forming units per mL.

The green fluorescents represent living bacteria while red fluorescents represent dead bacteria. The scale bar is 20  $\mu\text{m}$ .

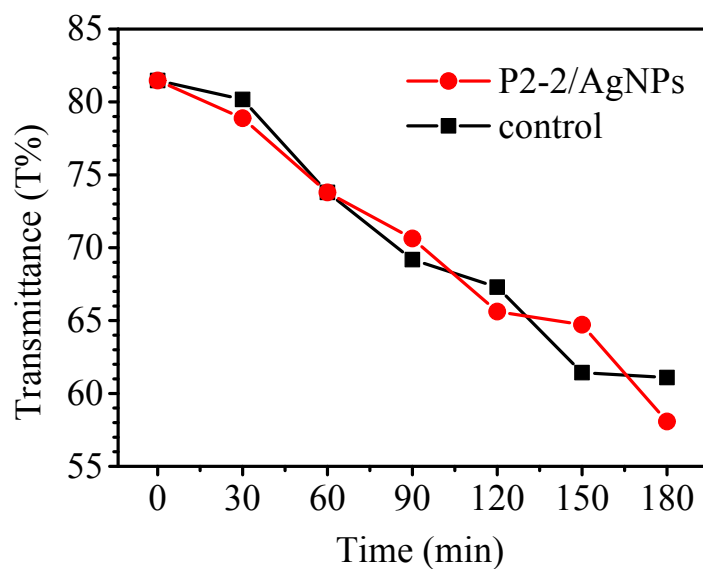

**Figure S10.** The transmittances of *E. coli* suspension (OD = 0.03 at 620 nm) in LB medium with/without P2-2/AgNPs coated silicon wafer at 620 nm monitored by a microplate reader (Varioskan Flash, Thermo Scientific, USA) within 3 h. The test interval is 30 minutes. The 24-well plate used for test is from Nunc, Thermo Scientific, USA.

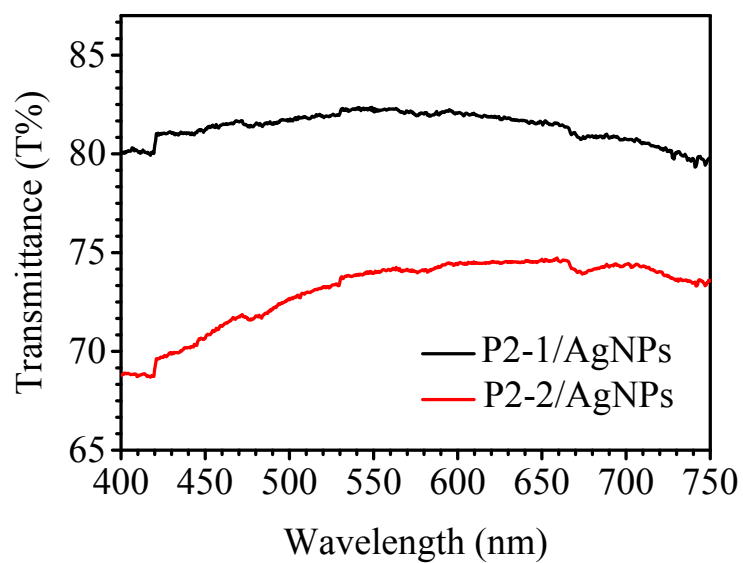

**Figure S11.** UV-vis transmittances of P2s/AgNPs coated glass slides over a wavelength range of 400-750 nm.

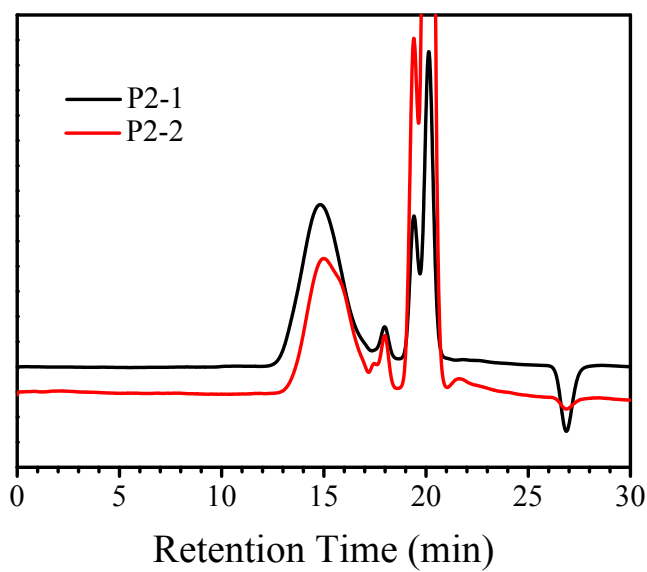

**Figure S12.** SEC spectra of P2s.



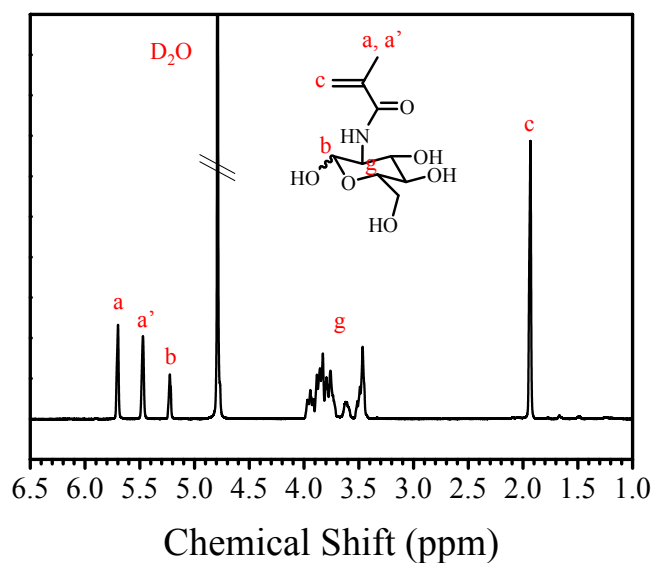

**Figure S13.**  $^1\text{H}$  NMR spectrum of MAG in  $\text{D}_2\text{O}$ .

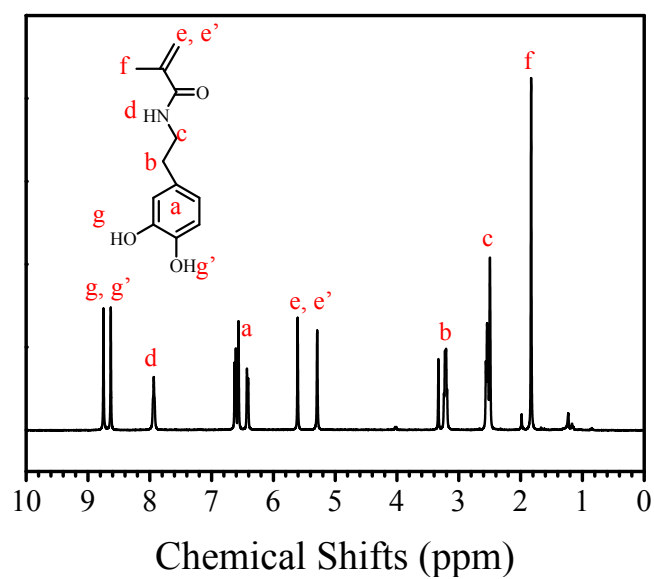

**Figure S14.**  $^1\text{H}$  NMR spectrum of DMA in  $\text{DMSO}-d_6$ .

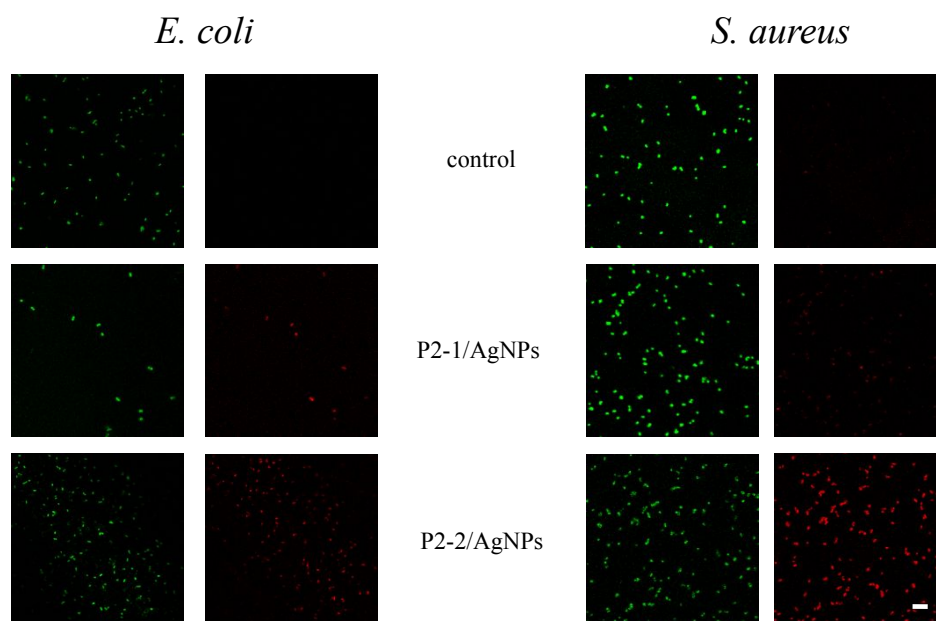

**Figure S15.** Additional CLSM images of *E. coli* and *S. aureus* adhered on uncoated glass slides and P2-1/AgNPs, P2-2/AgNPs coated glass slides. The bacterial concentration of *E. coli* and *S. aureus* were  $1 \times 10^7$  colony forming units per mL. Green fluorescents represent living and dead cells while red fluorescents represent dead cells of the same image. The scale bar is 10  $\mu\text{m}$ .
